# Supplementary figures and images for: Huntingtin regulates calcium fluxes in skeletal muscle
Source: PubMed Central journal article supplement — J Gen Physiol. 2022 Nov 21;155(1):e202213103. doi: 10.1085/jgp.202213103 (PMC9682417; doi:10.1085/jgp.202213103), 2022-11-21

Source data fig1

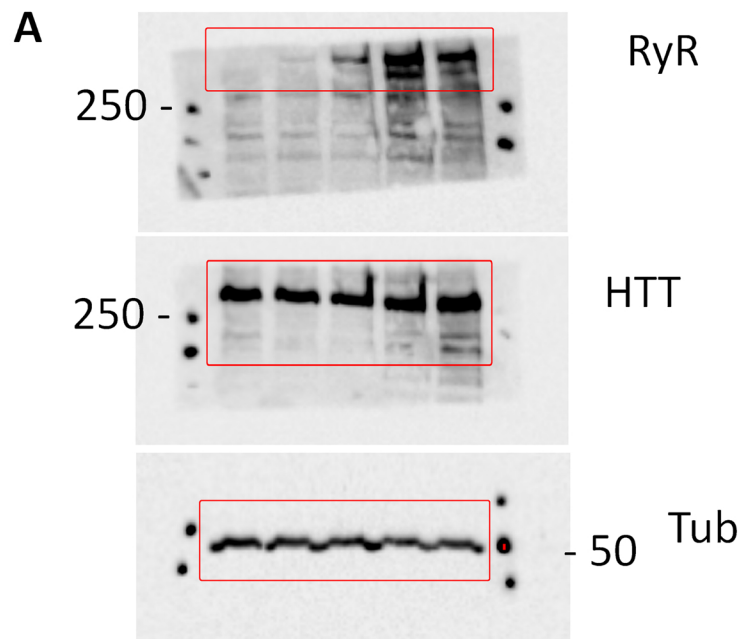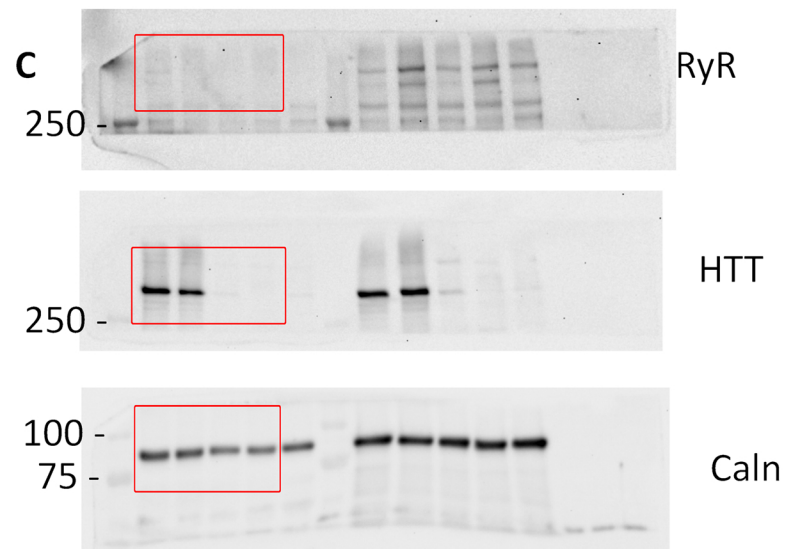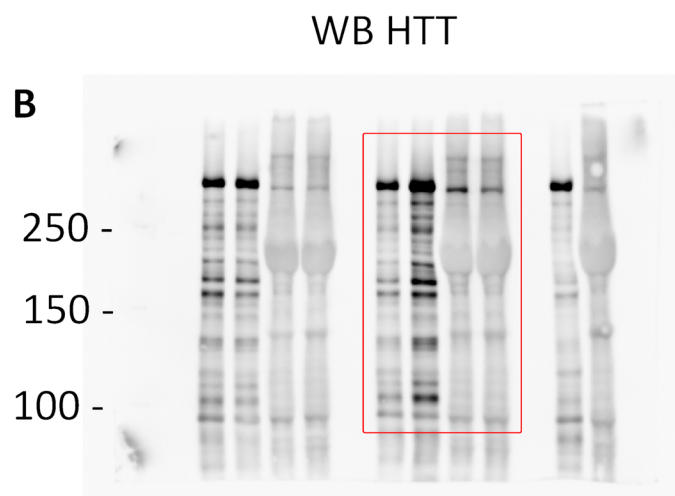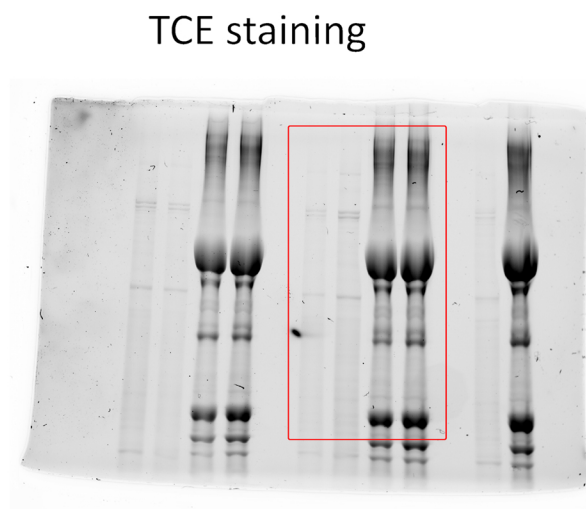

Supplement: JGP_202213103_SourceDataF1.pdf [file JGP_202213103_SourceDataF1.pdf]

Figure 3A

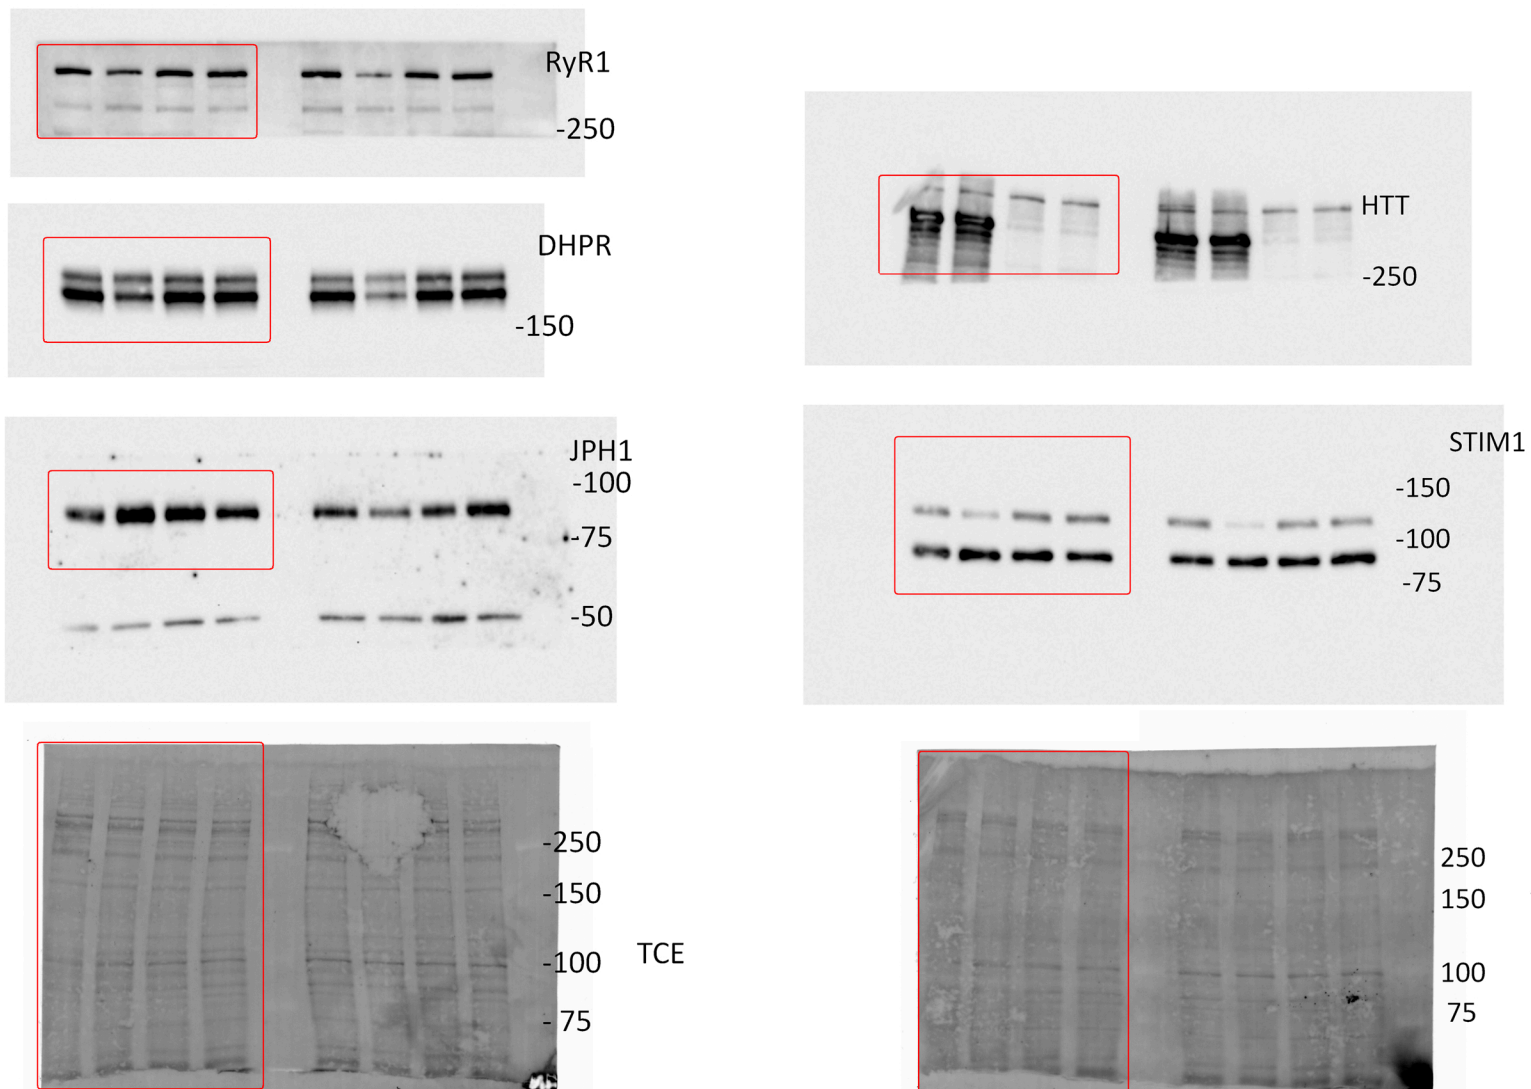

Figure 3B

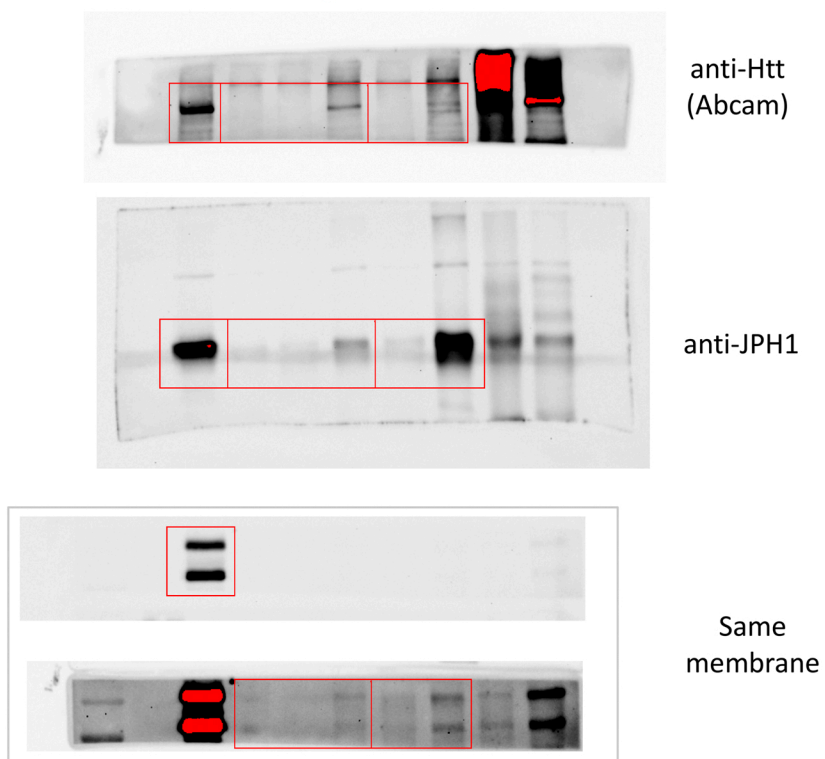

Supplement: JGP_202213103_SourceDataF3.pdf [file JGP_202213103_SourceDataF3.pdf]

# Source data fig4

## HTT – 3 months

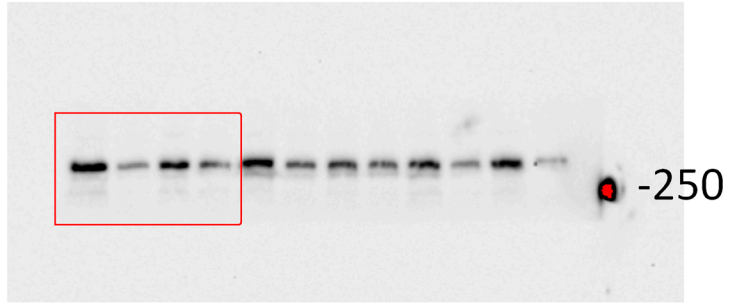

## HTT – 10 months

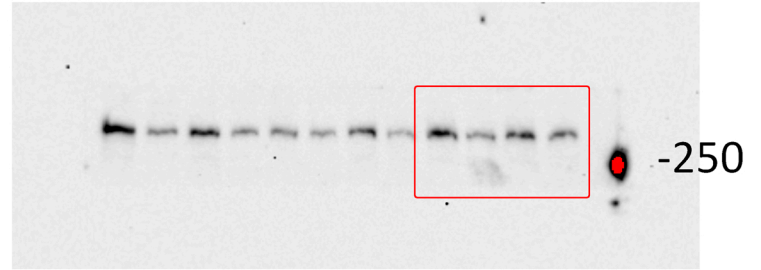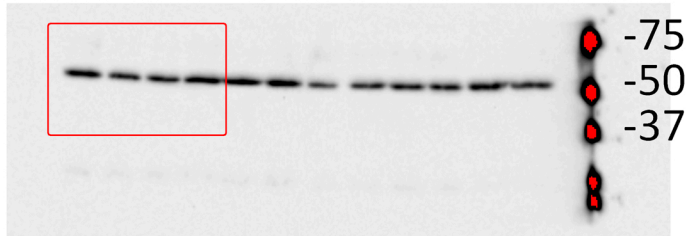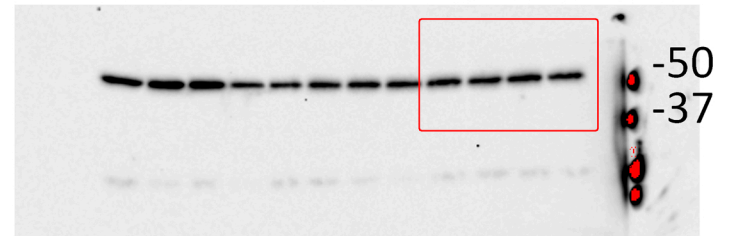

Supplement: JGP_202213103_SourceDataF4.pdf [file JGP_202213103_SourceDataF4.pdf]

Source data fig6 A

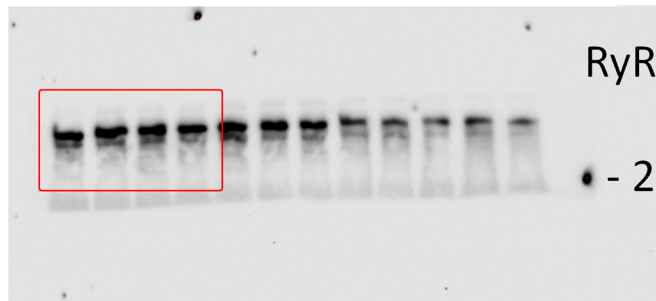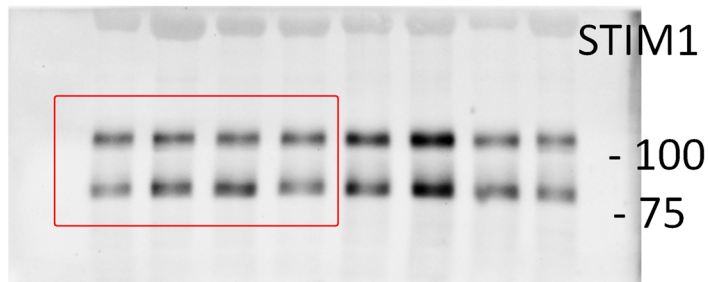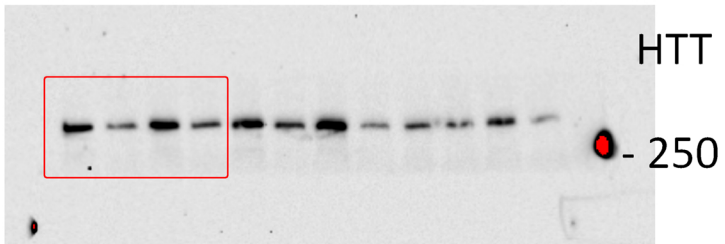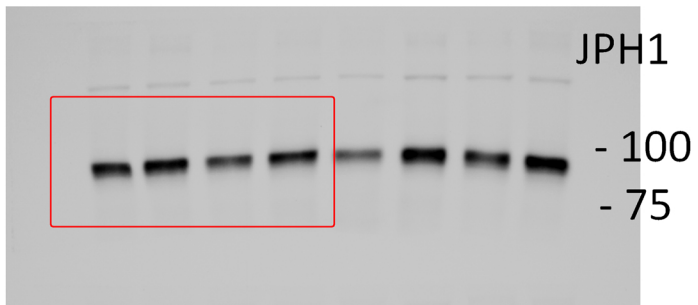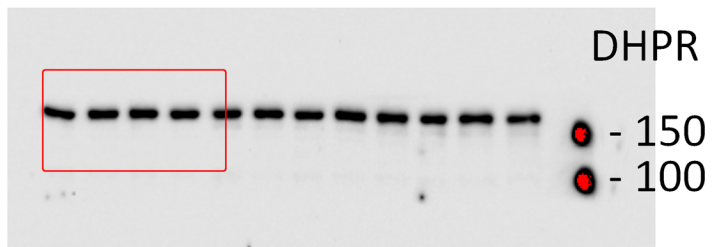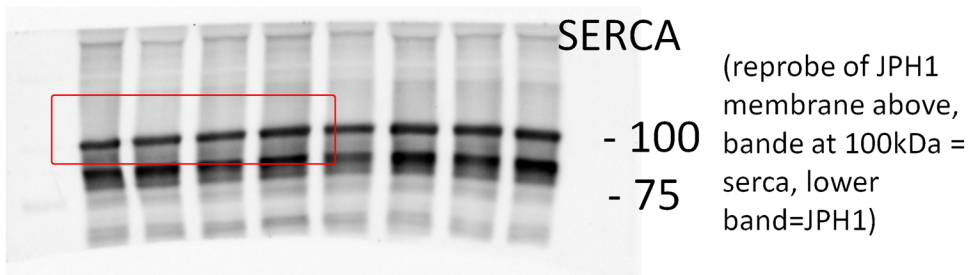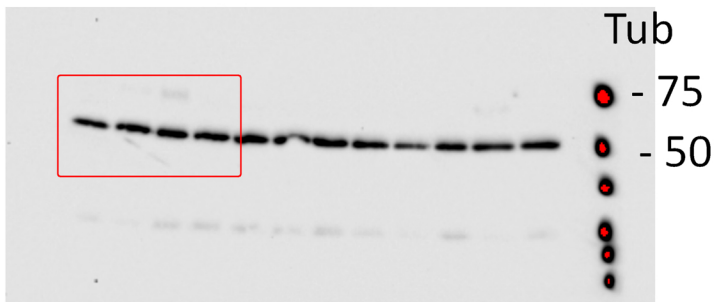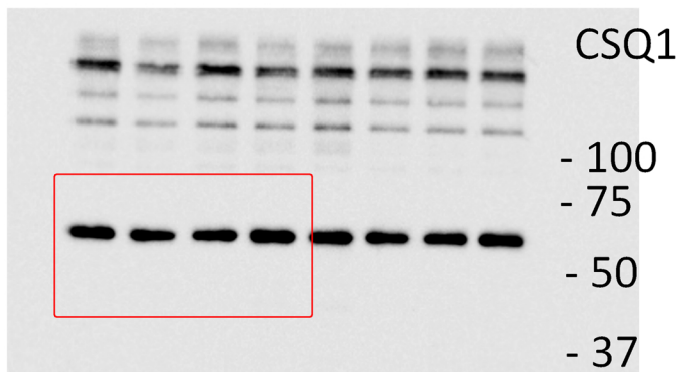

Supplement: JGP_202213103_SourceDataF6.pdf [file JGP_202213103_SourceDataF6.pdf]
